# Supplementary material for: DNAzyme Catalyzed Tyramide Depositing Reaction for In Situ Imaging of Protein Status on the Cell Surface
Source: PubMed Central journal article supplement — Theranostics. 2019 Mar 16;9(7):1993–2002. doi: 10.7150/thno.31943 (PMC6485291; doi:10.7150/thno.31943), 2019-03-16
Supplement: thnov09p1993s1.pdf [file thnov09p1993s1.pdf]

## Supporting information

# **DNAzyme catalyzed tyramide depositing reaction for in situ imaging of protein status on the cell surface**

Lulu Xu<sup>1,2,#</sup>, Shengchun Liu<sup>3,#</sup>, Tiantian Yang<sup>1</sup>, Yifan Shen<sup>1</sup>, Yuhong Zhang<sup>1</sup>, Lizhen Huang<sup>1</sup>, Lutan Zhang<sup>1</sup>, Shijia Ding<sup>4</sup>, Fangzhou Song<sup>2,\*</sup>, Wei Cheng<sup>1,\*</sup>

<sup>1</sup> The Center for Clinical Molecular Medical Detection, The First Affiliated Hospital of Chongqing Medical University, Chongqing 400016, P. R. China

<sup>2</sup> Molecular Medicine and Cancer Research Center, Chongqing Medical University, Chongqing 400016, P. R. China

<sup>3</sup> Department of Endocrine and Breast Surgery, The First Affiliated Hospital of Chongqing Medical University, Chongqing 400016, P. R. China

<sup>4</sup> Key Laboratory of Clinical Laboratory Diagnostics (Ministry of Education), College of Laboratory Medicine, Chongqing Medical University, Chongqing 400016, P. R. China

# These authors contributed equally to this work.

\* Corresponding author:

Prof. Fangzhou Song, E-mail addresses: fzsongcq@163.com

Prof. Wei Cheng, E-mail addresses: chengwei@hospital.cqmu.edu.cn.

**Table S1.** The sequences of oligonucleotides used in this work.

| Name                        | Sequence (5' – 3')                                                                |
|-----------------------------|-----------------------------------------------------------------------------------|
| Apt2-g4<br>(spacer 0)       | <u>GTGGGT</u> <b>GGTGCACAGTCTAACGCAACAGAAAGCCAGCACCAACGCC</b>                     |
| Apt2-g8<br>(spacer 0)       | <b>CCGCAACCACGACCGAAAGACAACGCAATCTGACACGTGG</b> <u>GGGTGGGTGG</u>                 |
| Apt2-g4<br>(spacer 4)       | <u>GTGGGT</u> <b>TTTTTGGTGCACAGTCTAACGCAACAGAAAGCCAGCACCAACGCC</b>                |
| Apt2-g8<br>(spacer 4)       | <b>CCGCAACCACGACCGAAAGACAACGCAATCTGACACGTGG</b> <u>TTTTTGGGTGGGTGG</u>            |
| Apt2-G4<br>(spacer 8)       | <b>CCGCAACCACGACCGAAAGACAACGCAATCTGACACGTGG</b> <u>TTTTTTTTTGGGTGGGTGGGTGGGT</u>  |
| Apt2-g4<br>(spacer 8)       | <u>GTGGGT</u> <b>TTTTTTTTTGGTGCACAGTCTAACGCAACAGAAAGCCAGCACCAACGCC</b>            |
| Apt2-g8<br>(spacer 8)       | <b>CCGCAACCACGACCGAAAGACAACGCAATCTGACACGTGG</b> <u>TTTTTTTTTGGGTGGGTGG</u>        |
| Apt2-g4<br>(spacer 12)      | <u>GTGGGT</u> <b>TTTTTTTTTTTTTGGTGCACAGTCTAACGCAACAGAAAGCCAGCACCAACGCC</b>        |
| Apt2-g8<br>(spacer 12)      | <b>CCGCAACCACGACCGAAAGACAACGCAATCTGACACGTGG</b> <u>TTTTTTTTTTTTTGGGTGGGTGGTGG</u> |
| Random-G4                   | TCCCTACGGCGCTAACCTCCCAACCGCTCCACCCTGCCTCCGTTTTTTTTT <u>GGGTGGGTGGG</u>            |
| FITC-Apt2                   | <b>FITC-CCGCAACCACGACCGAAAGACAACGCAATCTGACACGTGG</b>                              |
| FITC-Apt2-g4<br>(spacer 8)  | FITC- <u>GTGGGT</u> <b>TTTTTTTTTGGTGCACAGTCTAACGCAACAGAAAGCCAGCACCAACGCC</b>      |
| TAMRA-Apt2-g8<br>(spacer 8) | <b>CCGCAACCACGACCGAAAGACAACGCAATCTGACACGTGG</b> <u>TTTTTTTTTGGGTGGGTGG-TAMRA</u>  |
| Apt3-g8<br>(spacer 8)       | <b>CGGACGAATGCTTTGATGTTGTGCTGGATCCAGCGTTCATTCTC</b> <u>TTTTTTTTTGGGTGGTGG</u>     |

Notes: Aptamer sequence was shown in bold. The intact G-quadruplex sequence and split G-quadruplex sequence were indicated by underline.

**Table S2.** The comparison of immunohistochemistry and this method.

| Method | Materials                                          | Time<br>(hours) | Cost<br>(dollar/test) | Application          |
|--------|----------------------------------------------------|-----------------|-----------------------|----------------------|
| IHC    | Antibody, HRP<br>Polymer and DAB Plus<br>Chromogen | >12             | ≈4                    | Protein              |
| DCTDR  | DNA Probes and<br>tyramide reagent                 | < 6             | ≈1.3                  | Protein and<br>dimer |

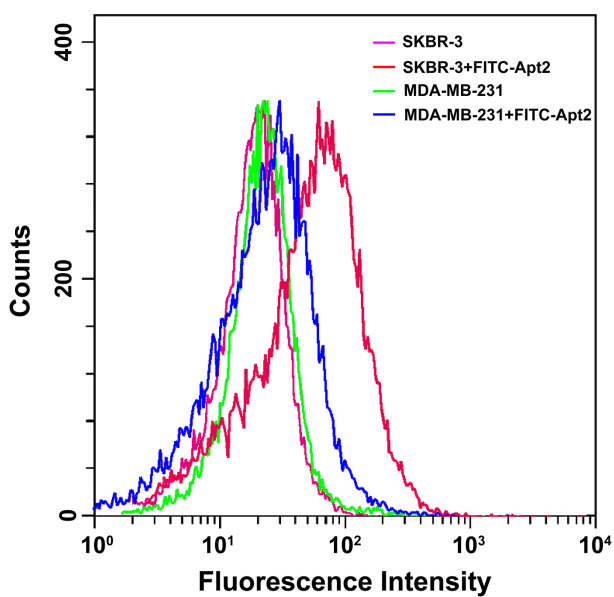

**Figure S1.** The flow cytometry analysis the specific binding of aptamer by using the FITC-labeled HER2 aptamer.

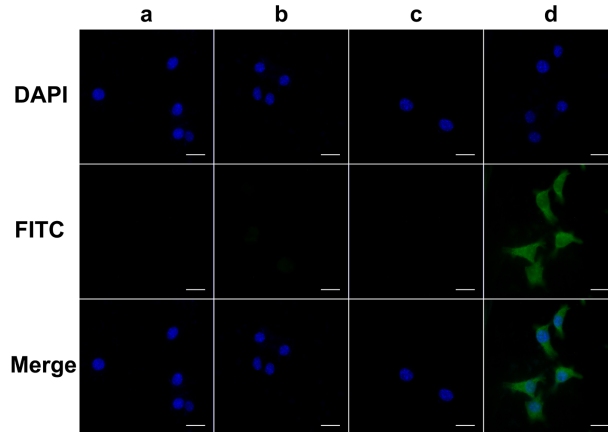

**Figure S2.** Feasibility of DCTDR on SKBR-3 cells surface. DCTDR system without Apt2-G4 probes (a) or without hemin (b), and complete DCTDR system with random sequence-G4 probes (c) or with Apt2-G4 probes (d). Scale bar: 25  $\mu\text{m}$ .

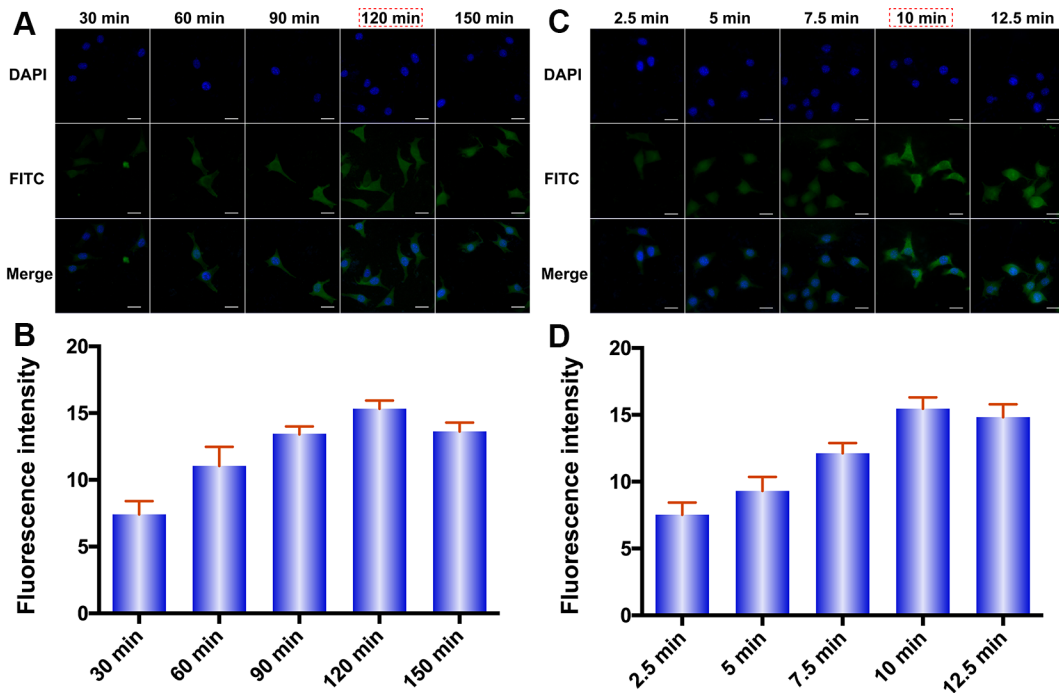

**Figure S3.** Dependences of DCTDR-based imaging (A, C) and fluorescence intensity analysis (B, D) of SKBR-3 cells on the incubation time of Apt2-G4 probes

(A, B) and the reaction time of DNAzyme catalyzed tyramide deposition (C, D).  
 Scale bar: 25  $\mu\text{m}$ .

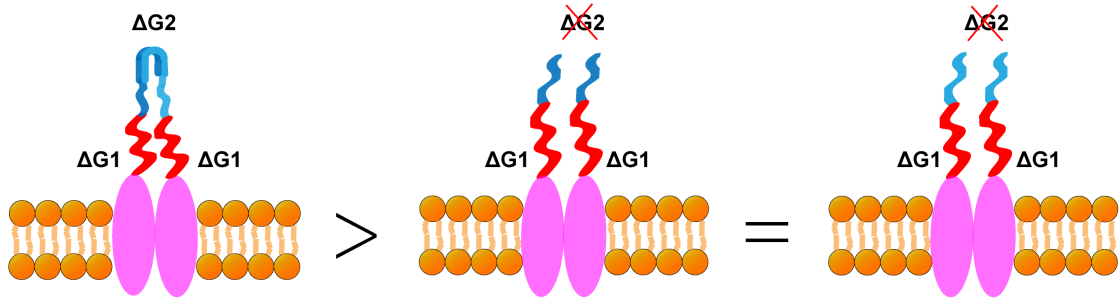

**Figure S4.** Schematic diagram of the formation of three proximity complexes in our proximity-induced DCTDR system.

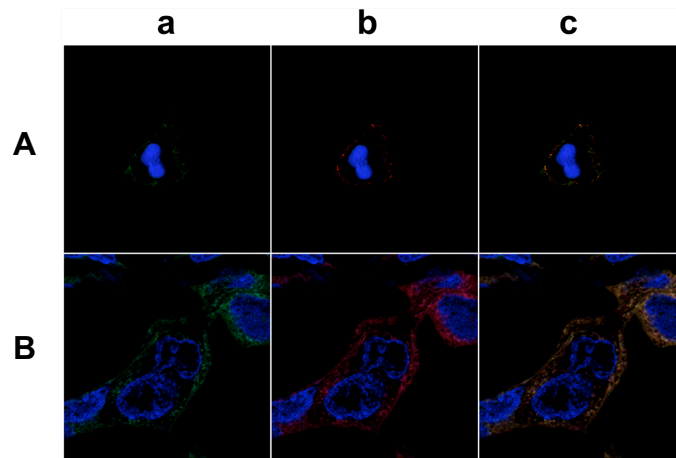

**Figure S5.** Confocal microscopy imaging of SKBR-3 cell with  $\times 400$  magnification (A) and HER2 over-expressed breast cancer tissue with  $\times 1260$  magnification (B) by using the FITC-labeled Apt2-g4 and TAMRA-labeled Apt2-g8 probes to analyze. FITC+DAPI (a), TAMRA+DAPI(b), FITC+ TAMRA+DAPI (c).

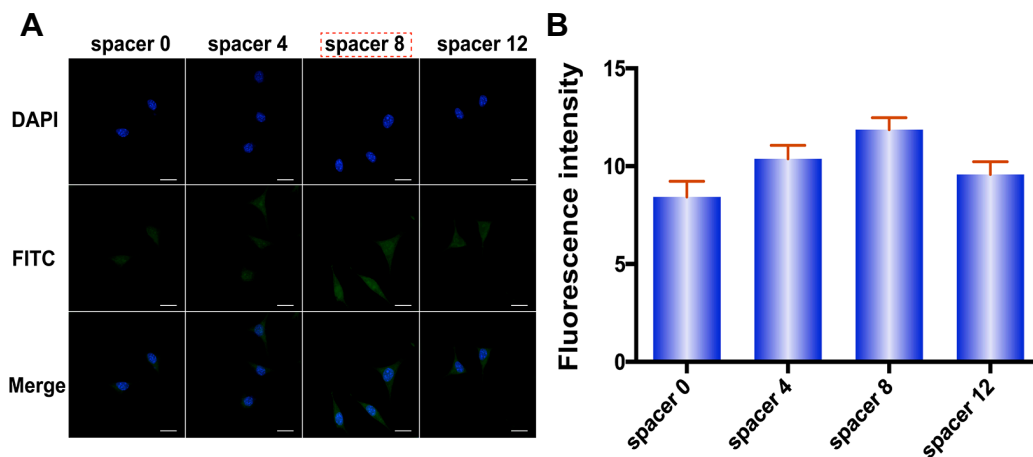

Figure S6. Proximity-induced DCTDR imaging (A) and fluorescence intensity analysis (B) of SKBR-3 cells with different spacer lengths between split G4 and aptamer sequence. Scale bar: 25  $\mu\text{m}$ .

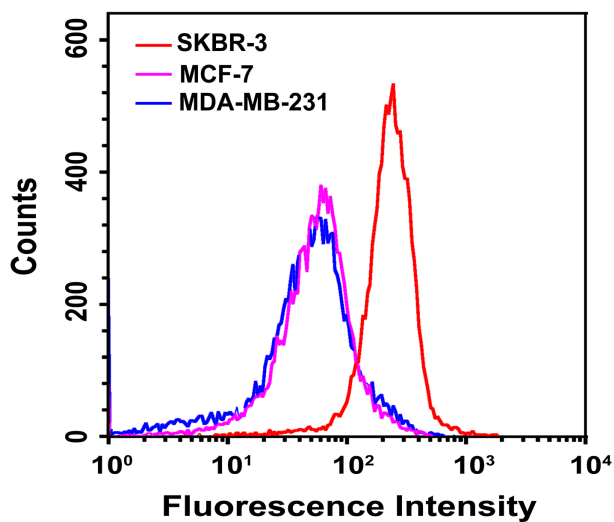

Figure S7. The flow cytometry analysis HER2 homodimer of SKBR-3, MCF-7 and MDA-MB-231 cells based on proximity-induced DCTDR.
